# Supplementary material for: Evaluation of the Most Stressful Dental Treatment Procedures of Conservative Dentistry among Polish Dental Students
Source: MDPI journal article supplement (doi:10.3390/ijerph18094448), 2021-04-22
Supplement: s1 [file s1]

|                                                                                                                                                                                                                                                                                                                                                                                                                                                                                                                                                                                               |      |                                                                                                                                                                                                                                            |
|-----------------------------------------------------------------------------------------------------------------------------------------------------------------------------------------------------------------------------------------------------------------------------------------------------------------------------------------------------------------------------------------------------------------------------------------------------------------------------------------------------------------------------------------------------------------------------------------------|------|--------------------------------------------------------------------------------------------------------------------------------------------------------------------------------------------------------------------------------------------|
|                                                                                                                                                                                                                                                                                                                                                                                                                                                                                                                                                                                               |      |                                                                                                                                                                                                                                            |
| <b>What level of stress do you feel when performing the following procedures</b>                                                                                                                                                                                                                                                                                                                                                                                                                                                                                                              |      |                                                                                                                                                                                                                                            |
| Year of study:                                                                                                                                                                                                                                                                                                                                                                                                                                                                                                                                                                                | Age: | Sex: Female / Male                                                                                                                                                                                                                         |
| <p align="center"><b>Scale: 0 1 2 3 4 5 6</b></p> <p align="center">0 – no stress; 1, 2 – low stress; 3, 4 – medium stress; 5, 6 – high stress.</p>                                                                                                                                                                                                                                                                                                                                                                                                                                           |      |                                                                                                                                                                                                                                            |
| 1. Determination of working length (III,12)<br>2. Treatment of a deep caries (II,6)<br>3. Making a diagnosis (I, 3)<br>4. Finding the canal's orifices (III, 11)<br>5. Adjustment of the filling to the occlusion (II, 8)<br>6. Radiological evaluation of the filled canal (III, 14)<br>7. Infiltration anesthesia (II, 4)<br>8. Pulpotomy (III,10)<br>9. Placement of a matrix (II, 7)<br>10. Dental examination (I, 2)<br>11. Preparing endodontic access (III, 9)<br>12. Conductive anesthesia(II, 5)<br>13. Taking patient's anamnesis (I, 1)<br>14. Oburation of a root canal (III, 13) |      | 0 1 2 3 4 5 6<br>0 1 2 3 4 5 6 |
| I-Diagnosis<br><br>II Caries Treatment<br><br>III Endodontic Treatment                                                                                                                                                                                                                                                                                                                                                                                                                                                                                                                        |      |                                                                                                                                                                                                                                            |
